# Supplementary material for: Comprehensive Physiologically Based Pharmacokinetic Model to Assess Drug–Drug Interactions of Phenytoin
Source: MDPI journal article supplement (doi:10.3390/pharmaceutics15102486), 2023-10-18
Supplement: s1 [file s1]

# Comprehensive Physiologically Based Pharmacokinetic Model to Assess Drug–Drug Interactions of Phenytoin

## Supplementary Materials

Leyanis Rodriguez-Vera <sup>1,†</sup>, Xuefen Yin <sup>1,†</sup>, Mohammed Almoslem <sup>1</sup>, Karolin Romahn <sup>1</sup>, Brian Cicali <sup>1</sup>, Viera Lukacova <sup>2</sup>, Rodrigo Cristofolletti <sup>1,\*</sup> and Stephan Schmidt <sup>1,\*</sup>

<sup>1</sup> Center for Pharmacometrics and System Pharmacology at Lake Nona (Orlando), Department of Pharmaceutics, College of Pharmacy, University of Florida, Orlando, FL 32827, USA; leyanisrv80@gmail.com (L.R.-V.); xuefenyin@ufl.edu (X.Y.); almoslem.mj@gmail.com (M.A.); karolinromahn@gmail.com (K.R.); bcicali@ufl.edu (B.C.)

<sup>2</sup> Simulations Plus, Lancaster, CA 93534, USA; viera.lukacova@simulations-plus.com

\* Correspondence: rcristofolletti@ufl.edu (R.C.) and sschmidt@cop.ufl.edu (S.S.)

<sup>†</sup> These authors contributed equally to this work.

## Contents

### List of Tables

|                                                                                                                                                                                                                                                |   |
|------------------------------------------------------------------------------------------------------------------------------------------------------------------------------------------------------------------------------------------------|---|
| S1 Initial PBPK Model - Simulated <i>versus</i> observed PK parameters for phenytoin 250, 300, 400, and 900 mg intravenous and oral single and multiple doses in healthy subjects-----                                                         | 3 |
| S2 Solubility vs. pH profile from Serajuddin et al. 1993, and Chiang et al. 2013-----                                                                                                                                                          | 5 |
| S3 Dose proportionality evaluation results in the range 200-900 mg after single and multiple i.v. and oral doses-----                                                                                                                          | 6 |
| S4 Drug-dependent parameters of the drugs used in DDIs PBPK model for phenytoin-----                                                                                                                                                           | 6 |
| S5 DDI dynamic simulation- Simulated <i>versus</i> observed PK parameters ratio for phenytoin as a victim with fluconazole (200 and 400 mg), omeprazole (NM and IM), and phenytoin as a perpetrator with itraconazole in healthy subjects----- | 7 |

### List of Figures

|                                                                                                                                                                                                                                                                                              |    |
|----------------------------------------------------------------------------------------------------------------------------------------------------------------------------------------------------------------------------------------------------------------------------------------------|----|
| S1 Local sensitivity analysis -----                                                                                                                                                                                                                                                          | 8  |
| S2 Mass balance of phenytoin by Caraco et al. 2001-----                                                                                                                                                                                                                                      | 8  |
| S3 Relationship of phenytoin AUC values versus dose using the dose proportionality power model -----                                                                                                                                                                                         | 9  |
| S4 Model prediction of phenytoin concentration-time profiles of different studies in comparison with the observed data. After 250, 300, 400, and 900 mg single dose, in different formulations and administration routes (i.v. infusion and oral), in comparison with the observed data----- | 10 |
| S5 Model prediction of phenytoin concentration-time profiles in fast and fed conditions, after 300 mg single dose, tablet formulation, in comparison to observed data-----                                                                                                                   | 11 |
| S6 Simulated and observed phenytoin DDIs in semilogarithmic scale-----                                                                                                                                                                                                                       | 12 |
| S7 Phenytoin exposures and changes in the pharmacokinetic parameters in different unbound fraction (fup) scenarios-----                                                                                                                                                                      | 13 |

**Table S1.** Physiologically-based pharmacokinetic (PBPK) Model - Simulated *versus* observed PK parameters for phenytoin 250, 300, 400, and 900 mg intravenous and oral single and multiple doses in healthy subjects.

| Dose<br>[mg]    | Route                   | N<br>Gender | Age<br>[years]      | Weight<br>[kg]          | Data<br>set           | $C_{max}$ (Sim)<br>[μg/mL]    | $C_{max}$<br>ratio<br>(Sim/Obs) | $AUC_{0-t}$ (Sim)(μg-<br>h/mL)    | $AUC_{0-t}$ ratio<br>(Sim/Obs) | $AUC_{0-\infty}$ (Sim)<br>[μg-h/mL]    | $AUC_{0-\infty}$<br>ratio<br>(Sim/Obs) | Reference                   |
|-----------------|-------------------------|-------------|---------------------|-------------------------|-----------------------|-------------------------------|---------------------------------|-----------------------------------|--------------------------------|----------------------------------------|----------------------------------------|-----------------------------|
|                 |                         |             |                     |                         |                       | $C_{max}$<br>(Obs)<br>[μg/mL] |                                 | $AUC_{0-t}$<br>(Obs)<br>[μg-h/mL] |                                | $AUC_{0-\infty}$<br>(Obs)<br>[μg-h/mL] |                                        |                             |
| 250<br>mg<br>SD | i.v. infusion<br>(5min) | 6 M         | 26-48               | 75<br>[70.8-<br>78.2]   | Training <sup>a</sup> | -                             | -                               | 115.94                            |                                | 118.54                                 |                                        | Glazko et al.<br>1969 [1]   |
|                 |                         |             |                     |                         |                       | -                             | -                               |                                   | 0.95                           |                                        | 0.86                                   |                             |
| 300<br>mg<br>SD | po                      | 18M         | 30.5<br>[22-<br>43] | -                       | Training <sup>b</sup> | 4.19                          |                                 | 137.32                            |                                | 140.64                                 |                                        | Caraco et al.<br>2001 [2]   |
|                 |                         |             |                     |                         |                       | 3.22                          | 1.30                            |                                   | 1.16                           |                                        | 1.14                                   |                             |
| 300<br>mg<br>SD | po                      | 6M          | -                   | 78.2<br>[71.4-<br>88.2] | Training <sup>c</sup> | 3.95                          |                                 | 126.05                            |                                | 135.47                                 |                                        | Gugler et al.<br>1976 [3]   |
|                 |                         |             |                     |                         |                       | 3.83                          | 1.03                            |                                   | 1.08                           |                                        | 1.03                                   |                             |
| 300<br>mg<br>MD | po                      | 6M          | -                   | 78.2<br>[71.4-<br>88.2] | Training <sup>d</sup> | 7.94                          |                                 | 252.18                            |                                | 270.47                                 |                                        | Gugler et al.<br>1976 [3]   |
|                 |                         |             |                     |                         |                       | 8.15                          | 0.93                            |                                   | 0.94                           |                                        | 0.93                                   |                             |
| 300<br>mg<br>SD | i.v. infusion<br>(6min) | 6 M         | -                   | 78.2<br>[71.4-<br>88.2] | Test                  | -                             |                                 | 131.38                            |                                | 140.12                                 |                                        | Gugler et al.<br>1976 [3]   |
|                 |                         |             |                     |                         |                       | -                             | -                               |                                   | 0.80                           |                                        | 0.80                                   |                             |
| 300<br>mg<br>SD | po                      | 32M         | 27.6<br>[21-<br>40] | 77.4                    | Test                  | 4.66                          |                                 | 134.4                             |                                | 137.96                                 |                                        | Ducharme et<br>al. 1995 [4] |
|                 |                         |             |                     |                         |                       | 4.35                          | 1.07                            |                                   | 0.95                           |                                        | 0.96                                   |                             |
| 300<br>mg<br>SD | po                      | 10M         | 19-25               | 63-92                   | Test                  | 4.06                          |                                 | 125.92                            |                                | 138.34                                 |                                        | Prichard et<br>al. 1987 [5] |
|                 |                         |             |                     |                         |                       |                               | 1.12                            |                                   | 0.97                           |                                        | 1.05                                   |                             |

|                         |                                        |         |              |                  |      |                        |             |                   |             |                  |             |                            |
|-------------------------|----------------------------------------|---------|--------------|------------------|------|------------------------|-------------|-------------------|-------------|------------------|-------------|----------------------------|
|                         |                                        |         |              |                  |      | 3.64                   |             | 129.29            |             | 131.5            |             |                            |
| 400 mg SD               | po                                     | 6M      | 24-54        | 59-74            | Test | 4.74                   |             | 148.89            |             | 180.11           |             | Dill et al. 1956 [6]       |
|                         |                                        |         |              |                  |      | 3.72                   | <b>1.27</b> | 136.09            | <b>1.09</b> | 188.99           | <b>0.95</b> |                            |
| 900 mg SD               | po                                     | 6M      | 27.2 [22-32] | 74.7 [68.2-82.7] | Test | 5.44                   |             | 213.6             |             | 300.6            |             | Fraser et al. 1980 [7]     |
|                         |                                        |         |              |                  |      | 8.83                   | <b>0.61</b> | 322.73            | <b>0.66</b> | 446.08           | <b>0.67</b> |                            |
| 300 mg SD,              | po Fasted                              | 1 F 7 M | 23-27        | 61-80            | Test | 4.11                   |             | 115.11            |             | 139.03           |             | Melandar et al. 1979 [8]   |
|                         |                                        |         |              |                  |      | 4.56                   | <b>0.90</b> | 115.89            | <b>0.99</b> | 133.17           | <b>1.04</b> |                            |
| 300 mg <sup>a</sup> SD, | po Fed                                 | 1 F 7 M | 23-27        | 61-80            | Test | 4.82                   |             | 117.62            |             | 140.82           |             | Melandar et 1979 [8]       |
|                         |                                        |         |              |                  |      | 6.32                   | <b>0.76</b> | 132.39            | <b>0.89</b> | 146.41           | <b>0.96</b> |                            |
| 250 mg SD               | po, tablet                             | 11M     | 30.2 [22-42] | -                | Test | 3.70                   |             | 112.8             |             | 115.6            |             | Smith et al. 1976 [9]      |
|                         |                                        |         |              |                  |      | 3.18                   | <b>1.16</b> | 108.1             | <b>1.04</b> | 109              | <b>1.06</b> |                            |
| 248 mg SD               | po, capsule                            | 11M     | 30.2 [22-42] | -                | Test | 3.64                   |             | 111.8             |             | 114.6            |             | Smith et al. 1976 [9]      |
|                         |                                        |         |              |                  |      | 2.72                   | <b>1.34</b> | 99.18             | <b>1.13</b> | 101.6            | <b>1.13</b> |                            |
| 200 mg MD+ 250 mg SD    | po for 3 days + i.v. infusion (10 min) | 20M     | 19-43        | -                | Test | -                      |             | 113.05            | <b>0.91</b> | 192.36           | <b>0.95</b> | Blum et al. 1991 [10]      |
|                         |                                        |         |              |                  |      | -                      |             | 123.95            |             | 202.72           |             |                            |
| 250 mg SD               | po                                     | 9M      | 22-35        | -                | Test | 3.76                   |             | 99.69             | <b>0.46</b> | 115.83           | <b>0.42</b> | Touchette et al. 1992 [11] |
|                         |                                        |         |              |                  |      | 4.26                   | <b>0.88</b> | 215.79            | <b>0.46</b> | 274.89           | <b>0.42</b> |                            |
| N=163 subjects          |                                        |         |              |                  |      | GMFE (range)           |             | 1.01 (0.76- 1.34) |             | 0.91 (0.46-1.16) |             | 0.91 (0.42-1.14)           |
|                         |                                        |         |              |                  |      | Sim/Obs within 2- fold |             | 12 /12            |             | 14 /15           |             | 14/15                      |

a: the clinical study used for establishing distribution phase; b: the clinical study used for establishing metabolism phase; c: the clinical study used for establishing the absorption phase, and explore nonlinearity behavior; d: clinical study after multiple doses for stablishing autoinduction mechanism. (-) No available. The setting of integration time Step was "one-tenth hour". Cmax: maximum concentration; AUC: area under the curve; Sim: simulated; Obs: observed; SD: single dose; MD: multiple dose; i.v. intravenous; po: oral administration; GMFE: geometric mean fold error

**Table S2.** Solubility vs. pH profile from Serajuddin et al. 1993 [12], and Chiang et al. 2013 [13]

| PH    | Solubility (mg/mL) |
|-------|--------------------|
| 1.06  | 0.04               |
| 3.29  | 0.04               |
| 4.0   | 0.03               |
| 4.99  | 0.02               |
| 6.0   | 0.03               |
| 6.0   | 0.04               |
| 6.48  | 0.03               |
| 7.93  | 0.07               |
| 7.99  | 0.04               |
| 8.58  | 0.12               |
| 8.88  | 0.2                |
| 8.97  | 0.26               |
| 8.99  | 0.25               |
| 9.03  | 0.22               |
| 9.23  | 0.39               |
| 9.52  | 0.72               |
| 9.67  | 1.12               |
| 9.81  | 0.78               |
| 9.81  | 1.85               |
| 10.02 | 2.0                |
| 10.04 | 2.65               |
| 10.3  | 4.27               |
| 10.3  | 5.19               |
| 10.51 | 6.31               |
| 10.52 | 9.73               |
| 10.71 | 9.33               |

**Table S3.** Dose proportionality evaluation results in the range 200-900 mg after single and multiple i.v. and oral doses

|                 | Dose range | Beta   | 90% CI<br>lower bound | 90% CI<br>higher bound | BE limits<br>(0.8 - 1.25) |
|-----------------|------------|--------|-----------------------|------------------------|---------------------------|
| <b>i.v. SD</b>  | 200-900 mg | 1.3264 | 1.1704                | 1.4823                 | 0.8516-1.1483             |
| <b>i.v. SD*</b> | 200-600 mg | 1.0339 | 1.0058                | 1.062                  | 0.7969-1.2031             |
| <b>i.v. MD</b>  | 200-900 mg | 1.1084 | 1.0733                | 1.1435                 | 0.8516-1.1483             |
| <b>oral SD</b>  | 200-900 mg | 0.5314 | 0.3503                | 0.7526                 | 0.8516-1.1483             |
| <b>oral MD</b>  | 200-900 mg | 0.6911 | 0.4793                | 0.903                  | 0.8516-1.1483             |

\*Re-evaluation of dose linearity removing the 900 mg dose demonstrating that dose proportionality in the range 200-600 mg.

Red color highlight values outside the BE limits indicating lack of dose proportionality

**Table S4.** Drug-dependent parameters of the drugs used in drug-drug interactions (DDIs) PBPK model for phenytoin

| Drug        | DDI Mechanisms                                        | Parameters                               | Unit              | Value | Reference                  |
|-------------|-------------------------------------------------------|------------------------------------------|-------------------|-------|----------------------------|
| Fluconazole | Competitive Inhibition                                | MW                                       | g/mol             | 306.3 | GastroPlus library         |
|             |                                                       | logP                                     | -                 | 0.4   | GastroPlus library         |
|             |                                                       | pKa                                      | -                 | 2.03  | GastroPlus library         |
|             |                                                       | R <sub>bp</sub>                          | -                 | 1     | GastroPlus library         |
|             |                                                       | K <sub>i,rev-in vivo,U</sub> (CYP2C9)    | μM                | 19.6  | Kunze et al. 1996 [15]     |
|             |                                                       | K <sub>i,rev-in vitro,U</sub> (CYP2C19)  | μM                | 1.74  | Kunze et al. 1996 [15]     |
| Omeprazole  |                                                       | fup                                      | -                 | 0.87  | Kunze et al. 1996 [15]     |
|             |                                                       | MW                                       | g/mol             | 345.4 | GastroPlus library         |
|             |                                                       | logP                                     | -                 | 2.04  | GastroPlus library         |
|             |                                                       | pKa                                      | -                 | 14.7  | GastroPlus library         |
|             |                                                       | R <sub>bp</sub>                          | -                 | 7.1   | GastroPlus library         |
|             |                                                       | fup                                      | -                 | 0.58  | GastroPlus library         |
|             | Mechanism-based Inactivation + Competitive Inhibition | K <sub>i,irr-in vitro,T</sub> (CYP2C19)  | μM                | 5     | GastroPlus library         |
|             |                                                       | K <sub>inact</sub> (CYP2C19)             | min <sup>-1</sup> | 1.1   | Zvyaga et al. 2012 [16]    |
|             |                                                       | IC50 <sub>rev-in vitro,T</sub> (CYP2C19) | μM                | 0.048 | Zvyaga et al. 2012 [16]    |
|             |                                                       |                                          |                   | 8.4   | Shirisaka et al. 2013 [16] |

K<sub>i,rev-in vivo,U</sub>: Reversible in vivo inhibition constant, unbound; K<sub>i,rev-in vitro,U</sub>: Reversible in vitro inhibition constant, unbound; fu: unbound fraction; K<sub>i,irr-in vitro,T</sub>: Irreversible in vitro concentration for half-maximal inactivation, total; K<sub>inact</sub>: maximum inactivation rate constant; IC50<sub>rev-in vitro,T</sub>: Reversible half maximal inhibitory concentration

**Table S5.** DDI dynamic simulation- Simulated *versus* observed PK parameters ratio for phenytoin as a victim with fluconazole (200 and 400 mg), omeprazole (NM and IM), and phenytoin as a perpetrator with itraconazole in healthy subjects.

| Reference                     | Dosing                                                                                                                       | C <sub>max</sub> ratio (DDI/<br>Baseline)<br>Simulated | DDI C <sub>max</sub><br>ratio<br>(Simulated/<br>Observed) | AUC <sub>0-t</sub> ratio (DDI/<br>Baseline)<br>Simulated | DDI AUC <sub>0-t</sub><br>ratio<br>(Simulated/<br>Observed) | AUC <sub>0-∞</sub> ratio (DDI/<br>Baseline)<br>Simulated | DDI AUC <sub>0-∞</sub><br>ratio<br>(Simulated/<br>Observed) |
|-------------------------------|------------------------------------------------------------------------------------------------------------------------------|--------------------------------------------------------|-----------------------------------------------------------|----------------------------------------------------------|-------------------------------------------------------------|----------------------------------------------------------|-------------------------------------------------------------|
|                               |                                                                                                                              | C <sub>max</sub> ratio (DDI/<br>Baseline)<br>Observed  |                                                           | AUC <sub>0-t</sub> ratio (DDI/<br>Baseline)<br>Observed  |                                                             | AUC <sub>0-∞</sub> ratio (DDI/<br>Baseline)<br>Observed  |                                                             |
| Blum et al.<br>1991 [10]      | Phenytoin (victim)<br>(250mg i.v- Day 13)<br>+ Fluconazole<br>(perpetrator)<br>(200mg daily oral -<br>15days)<br>Single-dose | -                                                      | -                                                         | 2.05                                                     | 1.19                                                        | 5.38                                                     | 1.25                                                        |
|                               |                                                                                                                              | -                                                      |                                                           | 1.72                                                     |                                                             | 4.30                                                     |                                                             |
| Touchette et<br>al. 1992 [11] | Phenytoin<br>(victim)<br>(250mg oral- Day 4)<br>+ Fluconazole<br>(perpetrator)<br>(400mg oral daily-5<br>Days)               | 1.09                                                   | 0.98                                                      | 1.49                                                     | 1.17                                                        | 2.38                                                     | 0.99                                                        |
|                               |                                                                                                                              | 1.11                                                   |                                                           | 1.27                                                     |                                                             | 2.40                                                     |                                                             |
| Prichard et al.<br>1987 [5]   | Phenytoin<br>(victim)<br>(300 mg oral-Day 7)<br>+ Omeprazole (NM)<br>(perpetrator)<br>(40mg oral daily-9<br>Days)            | 1.12                                                   | 1.02                                                      | 1.33                                                     | 1.12                                                        | 1.37                                                     | 1.10                                                        |
|                               |                                                                                                                              | 1.10                                                   |                                                           | 1.19                                                     |                                                             | 1.25                                                     |                                                             |
|                               | Phenytoin<br>(victim)<br>(300 mg oral-Day 7)<br>+ Omeprazole (IM)<br>(perpetrator)<br>(40mg oral daily-9<br>Days)            | 1.14                                                   | 1.04                                                      | 1.44                                                     | 1.21                                                        | 1.54                                                     | 1.23                                                        |
|                               |                                                                                                                              | 1.10                                                   |                                                           | 1.19                                                     |                                                             | 1.25                                                     |                                                             |
| Ducharme et<br>al. 1995 [4]   | Itraconazole<br>(victim)<br>200 mg oral-Day 14)<br>+ Phenytoin<br>(perpetrator)<br>300 mg oral daily 17<br>days              | 0.362                                                  | 2.14                                                      | 0.0434                                                   | 0.89                                                        | 0.049                                                    | 0.96                                                        |
|                               |                                                                                                                              | 0.141                                                  |                                                           | 0.0536                                                   |                                                             | 0.0524                                                   |                                                             |

DDI: drug-drug interaction; C<sub>max</sub>: maximum concentration; AUC: area under the curve; iv: intravenous; NM: extensive metabolizer; IM: intermediate metabolizer.

## FIGURES

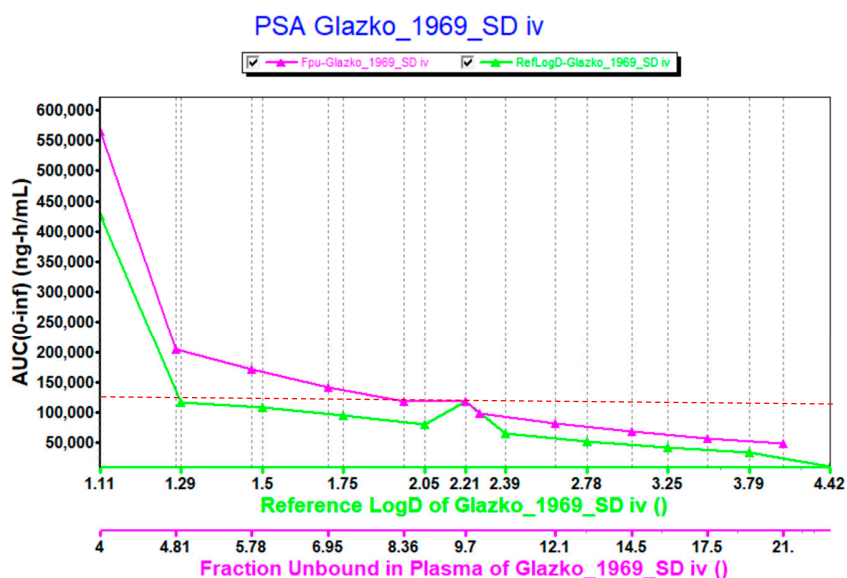

**Figure S1.** Local Sensitivity Analysis plot showing the unbound fraction (pink line) and lipophilicity (green line) vs. AUC0-inf from Glazko et al. 1969 clinical study. PSA: parameter sensitivity analysis

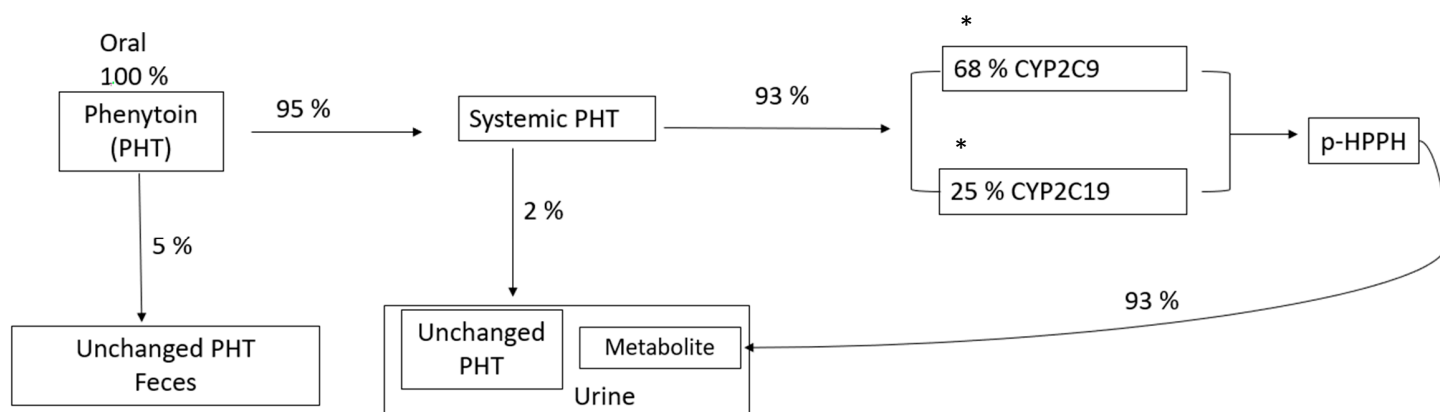

**Figure S2.** Mass balance of phenytoin by Caraco et al. 2001 [2]. p-HPPH: 5-parahydroxyphenyl-5-phenylhydantoin; CYP: cytochrome P450. \*equivalent to 73% CYP2C9 and 27% CP2C19 of the total dose administered (100%).



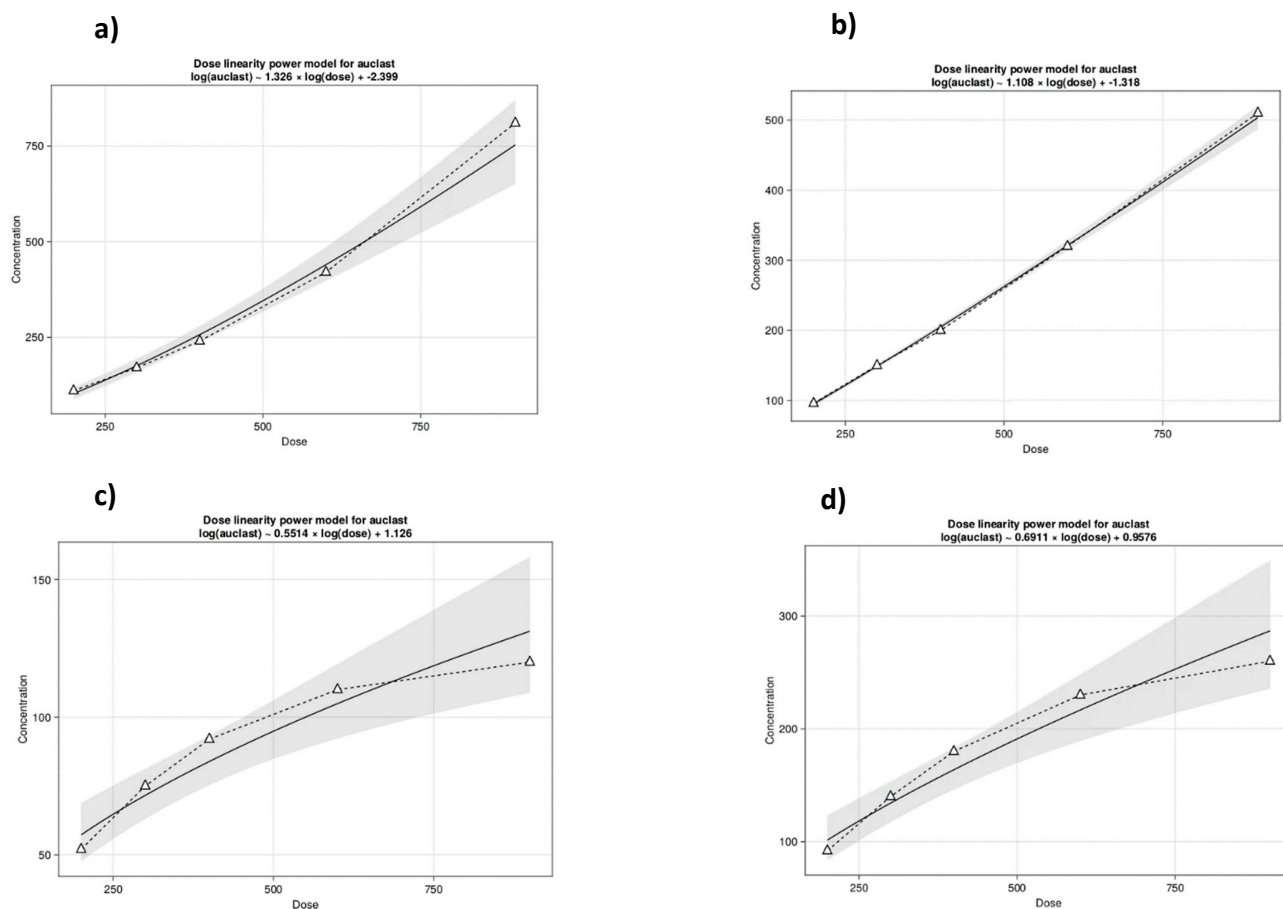

**Figure S3.** Relationship of phenytoin AUC values versus dose using the dose proportionality power model (*bold line*) and the 90% confidence range (*shaded area*). Triangles show the simulated values. **a)** i.v. single dose, **b)** i.v. multiple dose, **c)** oral single dose, and **d)** oral multiple dose.

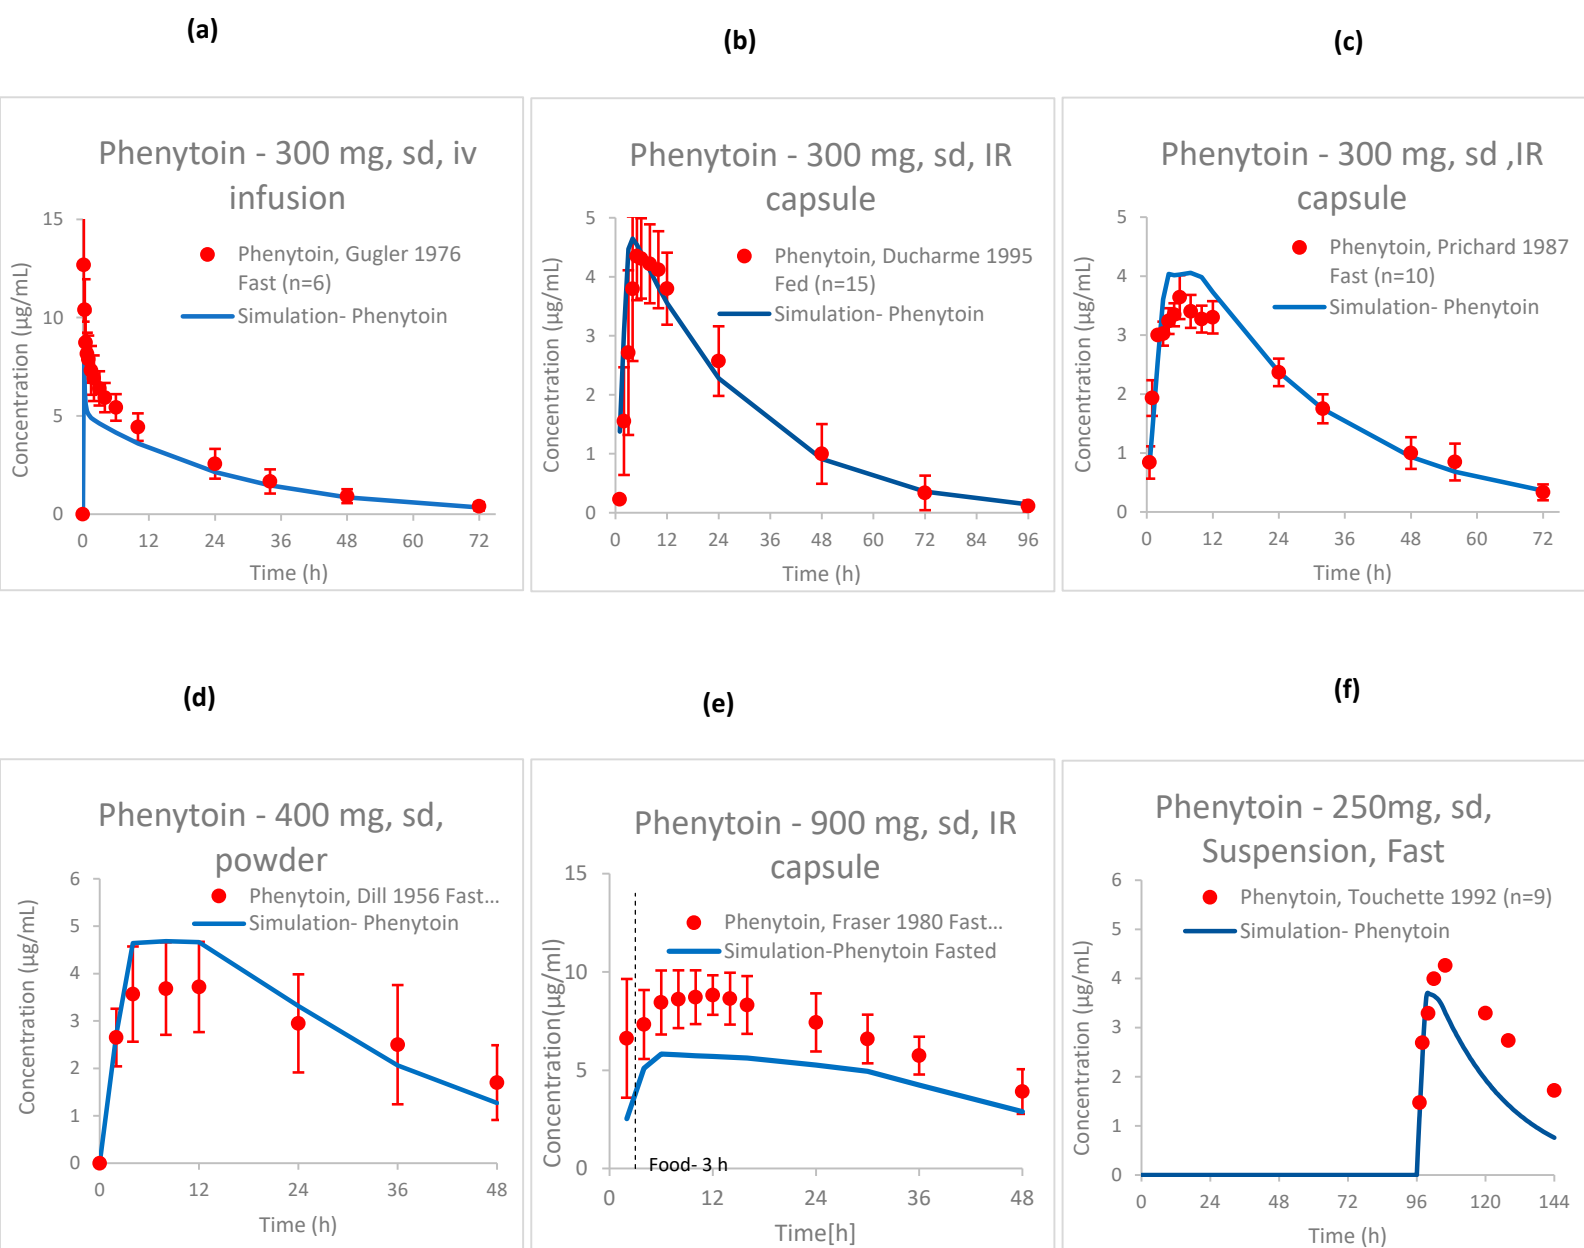

**Figure S4.** Model prediction of phenytoin concentration-time profiles of different studies in comparison with the observed data. After 250, 300, 400, and 900 mg single dose, in different formulations and administration routes (i.v. infusion and oral), in comparison with the observed data. Observed data are shown red dots  $\pm$  Standard Deviation (if available), and simulations are shown as blue or green solid lines. sd: single dose; i.v: intravenous; IR: immediate release. \* Fraser study after 3 hr was simulated

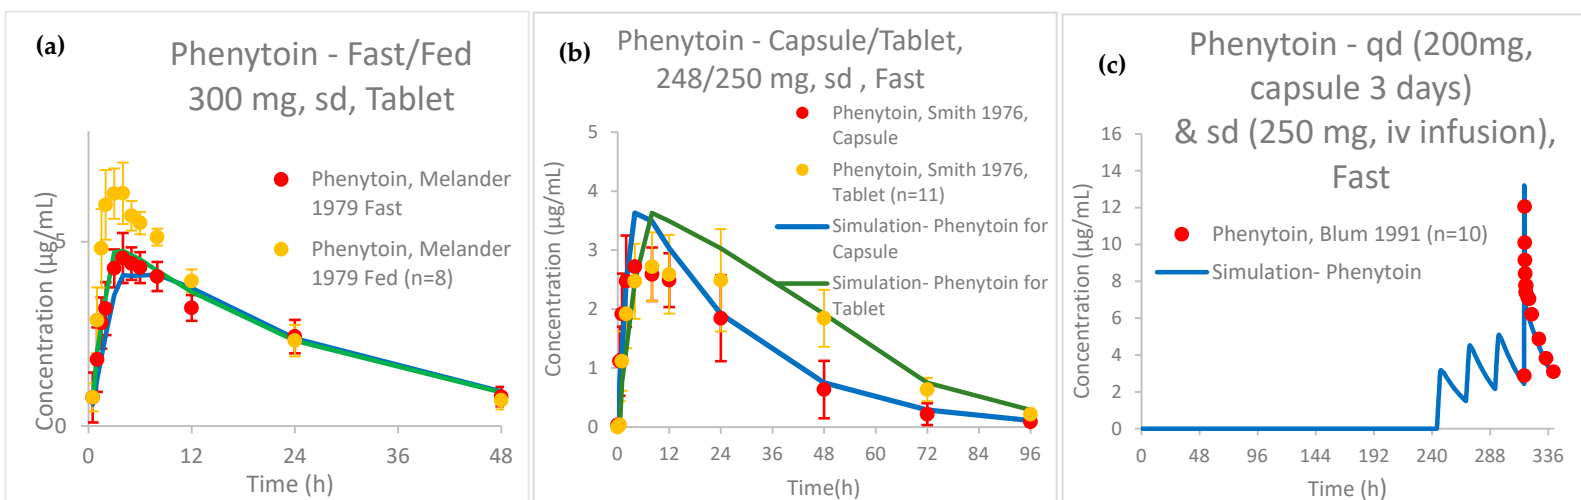

**Figure S5.** Model prediction of phenytoin concentration-time profiles in comparison to observed data **(a)** in fast and fed conditions, after 300 mg single dose, tablet formulation; **(b)** in different formulations: capsule and tablet and **(c)** in multiple doses of 200mg. Observed data are shown in red or yellow dots  $\pm$  Standard Deviation (if available), and simulations are shown as blue or green solid lines. sd: single dose.

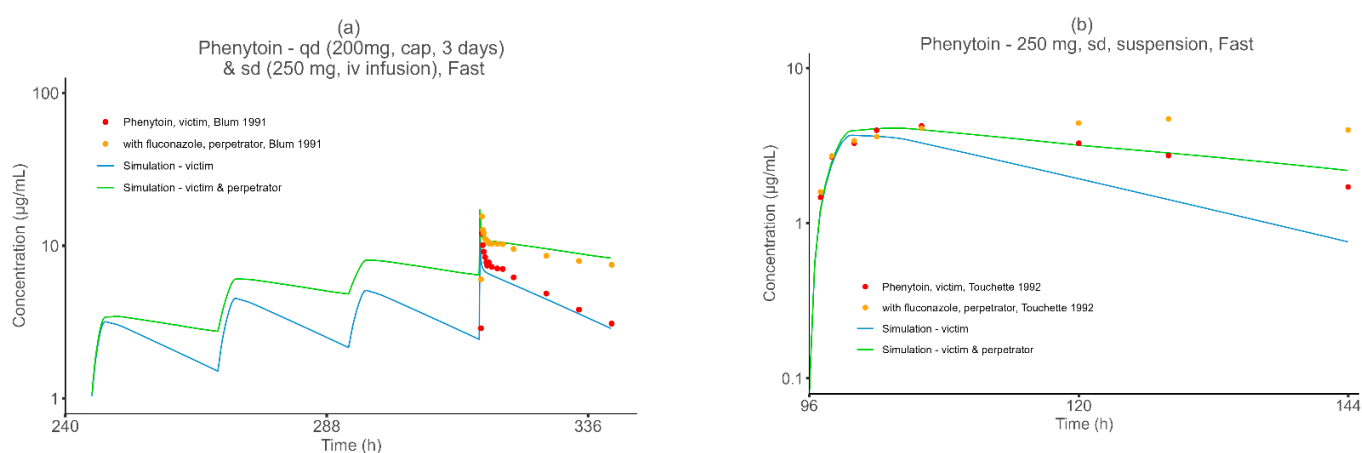

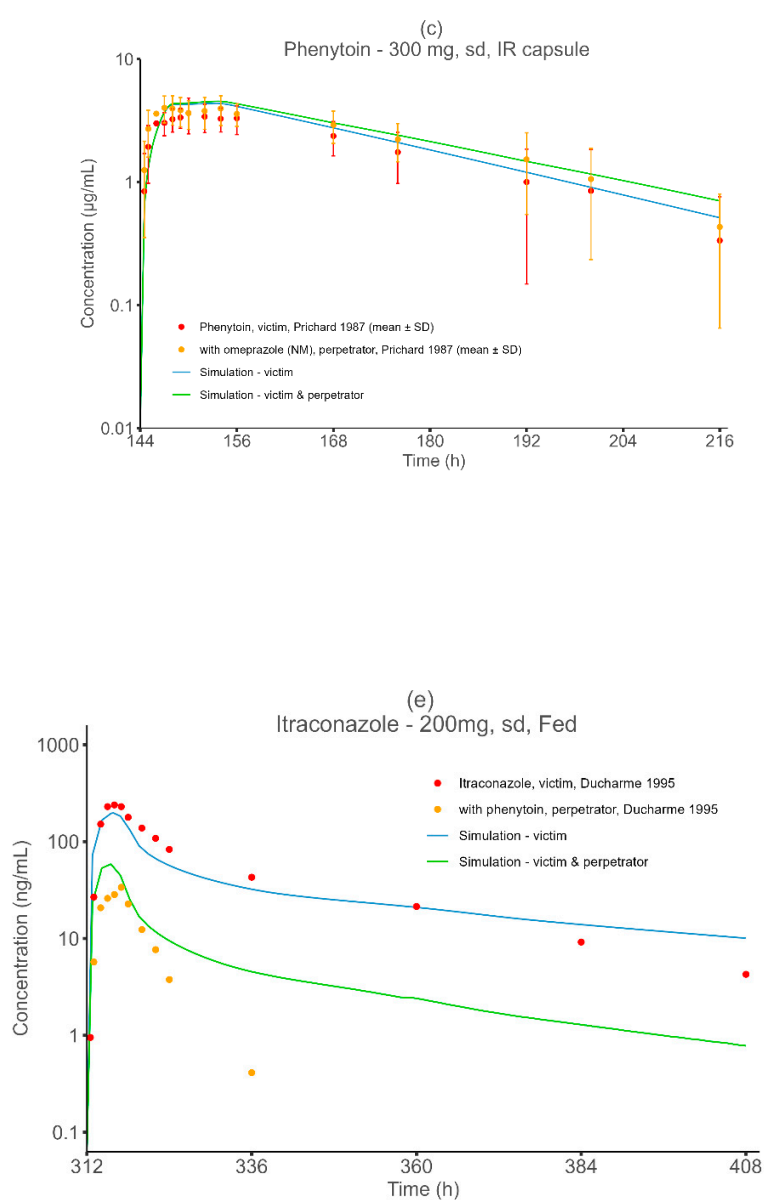

**Figure S6.** Simulated and observed phenytoin DDIs in semilogarithmic scale. Log Concentration-time profiles of phenytoin in comparison to observed data after (a) multiple- and (b) single-dose with and without fluconazole (200 and 400 mg) respectively, (c) phenytoin with and without omeprazole 40 mg in normal CYP2C19 metabolizers (NM), (d) phenytoin with and without omeprazole 40mg in intermediate CYP2C19 metabolizers (IM), (e) itraconazole concentration-times profiles before and during phenytoin co-administration. Observed data are shown as red and yellow dots, and simulations are shown as blue and green solid lines. q.d.: once daily; sd: single dose; PHT: phenytoin; IR: immediate release.

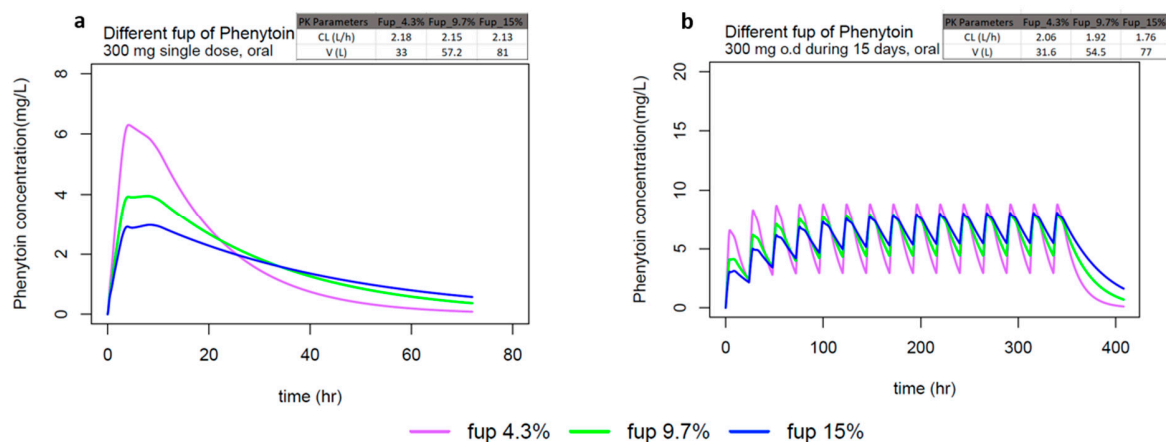

**Figure S7.** Phenytoin exposures and changes in the pharmacokinetic parameters in different unbound fraction (fup) scenarios after **a)** oral single dose and **b)** oral multiple dose. To account for the impact of the different fup values on the Vmax, a correction factor was calculated from the top down approach using the ratio  $V_{max\_newfup}/V_{max\_fup9.7}$ , and this correction factor was then applied to the optimized Vmax value in the final model.

## References

1. Glazko, A.J.; Chang, T.; Baukema, J.; Dill, W.A.; Goulet, J.R.; Buchanan, R.A. Metabolic Disposition of Diphenylhydantoin in Normal Human Subjects Following Intravenous Administration. *Clin. Pharmacol. Ther.* **1969**, *10*, 498–504, doi:10.1002/cpt1969104498.
2. Caraco, Y.; Muszkat, M.; Wood, A.J.J. Phenytoin Metabolic Ratio: A Putative Marker of CYP2C9 Activity in Vivo. *Pharmacogenetics* **2001**, *11*, 587–596, doi:10.1097/00008571-200110000-00005.
3. Gugler, R.; Manion, C. V.; Azarnoff, D.L. Phenytoin: Pharmacokinetics and Bioavailability. *Clin. Pharmacol. Ther.* **1976**, *19*, 135–142, doi:10.1002/cpt1976192135.
4. Murray, P.; Ducharme, R.; Slaughter, L.; Warbasse, P.; Chandrasekar, V.; Edwards, D. Itraconazole and Hydroxyitraconazole Serum Concentrations Are Reduced More than Tenfold by Phenytoin. *Clin. Pharmacol. Ther.* **1995**, *58*, 617–624.
5. Prichard PJ, Walt RP, Kitchingman GK, Somerville KW, Langman MJS, W.J. and R.A. Oral Phenytoin Pharmacokinetics during Omeprazole Therapy. *Br. J. clin. Pharmacol.* **1987**, *24*, 543–545.
6. DILL, W.A.; GLAZKO, A.J.; KAZENKO, A.; WOLF, L.M. Studies on 5, 5'-Diphenylhydantoin (Dilantin) in Animals and Man. *J. Pharmacol. Exp. Ther.* **1956**, *118*, 270–279.
7. Fraser, D.G.; Ludden, T.M.; Evens, R.P.; Sutherland, E.W. Displacement of Phenytoin from Plasma Binding Sites by Salicylate. *Clin. Pharmacol. Ther.* **1980**, *27*, 165–169, doi:10.1038/clpt.1980.25.
8. Melander, A.; Brante, G.; Johansson, O.; Lindberg, T.; Wählin-Boll, E. Influence of Food on the Absorption of Phenytoin in Man. *Eur. J. Clin. Pharmacol.* **1979**, *15*, 269–274, doi:10.1007/BF00618516.

9. Smith, T.C.; Kinkel, A. Absorption and Metabolism of Phenytoin from Tablets and Capsules. *Clin. Pharmacol. Ther.* **1976**, *20*, 738–742, doi:10.1002/cpt1976206738.
10. Blum, R.A.; Wilton, J.H.; Hilligoss, D.M.; Gardner, M.J.; Henry, E.B.; Harrison, N.J.; Schentag, J.J. Effect of Fluconazole on the Disposition of Phenytoin. *Clin. Pharmacol. Ther.* **1991**, *49*, 420–425, doi:10.1038/clpt.1991.49.
11. Touchette, M.; Chandrasekar, P.; Milad, M.; Edwards, D. Contrasting Effects of Fluconazole and Ketoconazole on Phenytoin and Testosterone Disposition in Man. *Br. J. Clin. Pharmacol.* **1992**, *34*, 75–78, doi:10.1111/j.1365-2125.1992.tb04111.x.
12. Serajuddin, A.T.M.; Jarowski, C.I. Influence of PH on Release of Phenytoin Sodium from Slow-release Dosage Forms. *J. Pharm. Sci.* **1993**, *82*, 306–310, doi:10.1002/jps.2600820318.
13. Chiang, P.C.; Wong, H. Incorporation of Physiologically Based Pharmacokinetic Modeling in the Evaluation of Solubility Requirements for the Salt Selection Process: A Case Study Using Phenytoin. *AAPS J.* **2013**, *15*, 1109–1118, doi:10.1208/s12248-013-9519-x.
14. Wood, J.H.; Syarto, J.E.; Letterman, H. Improved Holder for Intrinsic Dissolution Rate Studies. *J. Pharm. Sci.* **1965**, *54*, 1068, doi:10.1002/JPS.2600540730.
15. Kunze, K.L.; Trager, W.F. Warfarin-Fluconazole III - A Rational Approach to Management of a Metabolically Based Drug Interaction. *Drug Metab. Dispos.* **1996**, *24*, 429–435.
16. Zvyaga, T.; Chang, S.Y.; Chen, C.; Yang, Z.; Vuppugalla, R.; Hurley, J.; Thorndike, D.; Wagner, A.; Chimalakonda, A.; Rodrigues, A.D. Evaluation of Six Proton Pump Inhibitors as Inhibitors of Various Human Cytochromes P450: Focus on Cytochrome P450 2C19. *Drug Metab. Dispos.* **2012**, *40*, 1698–1711, doi:10.1124/dmd.112.045575.
